# Supplementary material for: Impact of pharmacist-conducted anticoagulation patient education and telephone follow-up on transitions of care: a randomized controlled trial
Source: PubMed Central journal article supplement (PMC7885504; doi:10.1186/s12913-021-06156-2), 2021-02-16
Supplement: 12913_2021_6156_MOESM1_ESM.pdf [file 12913_2021_6156_MOESM1_ESM.pdf]

## Appendix 1

### CASE REPORT FORM

#### Impact of pharmacist-conducted anticoagulation patient education and telephone follow-up on transitions of care: a randomized controlled trial

Patient Initials

Subject No.



FOLLOW-UP TELEPHONE CONTACT

40

| <b>Contacts</b>                                                 |                                  |
|-----------------------------------------------------------------|----------------------------------|
| <b>Name of Contact 1:</b>                                       | _____                            |
| Relationship:                                                   | _____                            |
| Caregiver? (Y/N)                                                | _____                            |
| Proxy? (Y/N)                                                    | _____                            |
| Designated to receive followup phone call? (Y/N)                | _____                            |
| Notes:                                                          | _____<br>_____                   |
| <b>Preferred Spoken Language</b>                                |                                  |
| _____                                                           |                                  |
| <b>Interpreter needed? (Y/N)</b>                                |                                  |
| <b>Preferred phone number:</b> ___ home ___ cell phone ___ work |                                  |
| <b>Home Phone:</b> (____) _____                                 | OK to leave message? (Y/N) _____ |
| Best time to call: _____                                        |                                  |
| <b>Cell Phone:</b> (____) _____                                 | OK to leave message? (Y/N) _____ |
| Best time to call: _____                                        |                                  |
| <b>Work Phone:</b> (____) _____                                 | OK to leave message? (Y/N) _____ |
| Best time to call: _____                                        |                                  |

| <b>PART I: Patient Demographics</b>                                                                                                                                                                                                                                                                                                                                                                                                                                                                                                                                                                                                                                                                                      |               |                                                                                                                                                                                                                                                                                                                                                                                                                        |                                                                       |                                                                                                                                                                                                                                                                                                                                                                                                                                                                                                                                                                                                                                                                                                                  |                                                                                                                  |                        |
|--------------------------------------------------------------------------------------------------------------------------------------------------------------------------------------------------------------------------------------------------------------------------------------------------------------------------------------------------------------------------------------------------------------------------------------------------------------------------------------------------------------------------------------------------------------------------------------------------------------------------------------------------------------------------------------------------------------------------|---------------|------------------------------------------------------------------------------------------------------------------------------------------------------------------------------------------------------------------------------------------------------------------------------------------------------------------------------------------------------------------------------------------------------------------------|-----------------------------------------------------------------------|------------------------------------------------------------------------------------------------------------------------------------------------------------------------------------------------------------------------------------------------------------------------------------------------------------------------------------------------------------------------------------------------------------------------------------------------------------------------------------------------------------------------------------------------------------------------------------------------------------------------------------------------------------------------------------------------------------------|------------------------------------------------------------------------------------------------------------------|------------------------|
| Patient Identification Number (MRN)                                                                                                                                                                                                                                                                                                                                                                                                                                                                                                                                                                                                                                                                                      | Year of Birth | Gender<br><input type="checkbox"/> M <input type="checkbox"/> F                                                                                                                                                                                                                                                                                                                                                        | Smoker<br><input type="checkbox"/> NO<br><input type="checkbox"/> YES | Weight (Kg): _____<br>Height (cm): _____<br>BMI (Kg/ m <sup>2</sup> ): _____                                                                                                                                                                                                                                                                                                                                                                                                                                                                                                                                                                                                                                     | Insurance type<br><input type="checkbox"/> Private <input type="checkbox"/> Public <input type="checkbox"/> None |                        |
| Allergies<br><input type="checkbox"/> NO <input type="checkbox"/> YES _____                                                                                                                                                                                                                                                                                                                                                                                                                                                                                                                                                                                                                                              |               | Date of Admission: <b>dd/mm/yr</b>                                                                                                                                                                                                                                                                                                                                                                                     | Chief complaint                                                       | Admission Diagnosis                                                                                                                                                                                                                                                                                                                                                                                                                                                                                                                                                                                                                                                                                              | Date of Discharge: <b>dd/mm/yr</b> _____                                                                         | Hospital LOS(d): _____ |
| <b>Inclusion Criteria:</b><br><input type="checkbox"/> Age > 18 years, discharged on any therapeutic anticoagulant including vitamin K antiagonists, non-vitamin K antagonist oral anticoagulants (apixaban, rivaroxaban, dabigatran), or parenteral anticoagulant for reasons other than venous thromboembolism prophylaxis.<br><input type="checkbox"/> <b>Discharge anticoagulation counseling documented on patient and family education form in the medical record</b><br><input type="checkbox"/> For whom communication via telephone calls was possible for follow up. Patients who had recently undergone surgery were also included if they were on therapeutic anticoagulation for a non-surgical indication. |               |                                                                                                                                                                                                                                                                                                                                                                                                                        |                                                                       | <b>Exclusion Criteria:</b><br><input type="checkbox"/> Patients discharged on anticoagulants for thromboembolism prophylaxis<br><input type="checkbox"/> Orthopedic thromboprophylaxis<br><input type="checkbox"/> Prescribed treatment duration less than 1 month                                                                                                                                                                                                                                                                                                                                                                                                                                               |                                                                                                                  |                        |
| <b>Indication for Anticoagulant</b><br><input type="checkbox"/> Atrial Fibrillation<br><input type="checkbox"/> VTE treatment<br><input type="checkbox"/> Other _____                                                                                                                                                                                                                                                                                                                                                                                                                                                                                                                                                    |               | <b>Antiplatelet use on admission</b><br><input type="checkbox"/> NO <input type="checkbox"/> YES<br><b>Specify antiplatelet therapy</b><br><input type="checkbox"/> aspirin 80-100mg<br><input type="checkbox"/> aspirin > 162-325mg<br><input type="checkbox"/> clopidogrel 75mg<br><input type="checkbox"/> prasugrel 10mg<br><input type="checkbox"/> ticagrelor 90mg<br><input type="checkbox"/> dual antiplatelet |                                                                       | <b>Anticoagulant prescribed on discharge</b><br><input type="checkbox"/> Acenocoumarol (sintrom)<br><input type="checkbox"/> Enoxaparin<br><input type="checkbox"/> Tinzaparin<br><input type="checkbox"/> Fondaparinux<br><input type="checkbox"/> Apixaban<br><input type="checkbox"/> Rivaroxaban<br><input type="checkbox"/> Dabigatran<br><input type="checkbox"/> Fluindinedione<br><input type="checkbox"/> Hydroxycoumarol (warfarin)<br><input type="checkbox"/> Other _____<br><b>Anticoagulant Dose</b> _____ (mg or units)<br><b>Frequency</b><br><input type="checkbox"/> Once daily<br><input type="checkbox"/> Bid<br><input type="checkbox"/> Q 48 hours<br><input type="checkbox"/> Other _____ |                                                                                                                  |                        |
| <b>Prescribing Service</b><br><input type="checkbox"/> Cardiology<br><input type="checkbox"/> Family Medicine<br><input type="checkbox"/> Haematology/Oncology<br><input type="checkbox"/> Infectious Diseases<br><input type="checkbox"/> Internal Medicine                                                                                                                                                                                                                                                                                                                                                                                                                                                             |               | <input type="checkbox"/> Neurology<br><input type="checkbox"/> Orthopaedic Surgery<br><input type="checkbox"/> Plastic Surgery<br><input type="checkbox"/> Pulmonary<br><input type="checkbox"/> Vascular Surgery<br><input type="checkbox"/> Other _____                                                                                                                                                              |                                                                       | <b>Creatinine clearance closest to the date that the discharge anticoagulant was prescribed</b> _____ ml/min                                                                                                                                                                                                                                                                                                                                                                                                                                                                                                                                                                                                     |                                                                                                                  |                        |

|  |  |  |
|--|--|--|
|  |  |  |
|--|--|--|

**PART II Medical History**

**PART II.i Bleeding Risk in Anticoagulated Patients with Atrial Fibrillation based on the HAS-BLED RISK SCORE: TOTAL SCORE \_\_\_\_\_**  
**(In the final score, only add up the major points)**

**1 point/ risk factor**

|                                                                                                                                                                                                                                                                                                                                                                                                                                                                             |                                                                                                                                                                                                                                                                                                                                                                                                                                             |
|-----------------------------------------------------------------------------------------------------------------------------------------------------------------------------------------------------------------------------------------------------------------------------------------------------------------------------------------------------------------------------------------------------------------------------------------------------------------------------|---------------------------------------------------------------------------------------------------------------------------------------------------------------------------------------------------------------------------------------------------------------------------------------------------------------------------------------------------------------------------------------------------------------------------------------------|
| <input type="checkbox"/> Hypertension<br><input type="checkbox"/> Abnormal renal function<br><input type="checkbox"/> (chronic dialysis<br><input type="checkbox"/> renal transplant<br><input type="checkbox"/> serum creatinine $\geq$ 2.3 mg/dL (200 $\mu$ mol/L)<br><input type="checkbox"/> Abnormal liver function<br><input type="checkbox"/> (cirrhosis<br><input type="checkbox"/> bilirubin > 2x UNL with AST/ALT/AP > 3x UNL)<br><input type="checkbox"/> Stroke | <input type="checkbox"/> Bleeding history<br><input type="checkbox"/> or predisposition (anemia)<br><input type="checkbox"/> Labile INR (Therapeutic time in range < 60%)<br><input type="checkbox"/> Elderly (greater than 65 years old)<br><input type="checkbox"/> Drugs<br><input type="checkbox"/> (other antiplatelet agents<br><input type="checkbox"/> or NSAIDs)<br><input type="checkbox"/> Alcohol (more than 8 drinks per week) |
|-----------------------------------------------------------------------------------------------------------------------------------------------------------------------------------------------------------------------------------------------------------------------------------------------------------------------------------------------------------------------------------------------------------------------------------------------------------------------------|---------------------------------------------------------------------------------------------------------------------------------------------------------------------------------------------------------------------------------------------------------------------------------------------------------------------------------------------------------------------------------------------------------------------------------------------|

|                                                                                                                                                                                                                                                                                                                                                                                                                                                                                                                                                                                                                                                                                                                                                                                                                                                                                                                                                                                                                              |                                                                                                                                                                                                                                                                                                     |                                                                                                                                                                                                                                                                                                                                                    |
|------------------------------------------------------------------------------------------------------------------------------------------------------------------------------------------------------------------------------------------------------------------------------------------------------------------------------------------------------------------------------------------------------------------------------------------------------------------------------------------------------------------------------------------------------------------------------------------------------------------------------------------------------------------------------------------------------------------------------------------------------------------------------------------------------------------------------------------------------------------------------------------------------------------------------------------------------------------------------------------------------------------------------|-----------------------------------------------------------------------------------------------------------------------------------------------------------------------------------------------------------------------------------------------------------------------------------------------------|----------------------------------------------------------------------------------------------------------------------------------------------------------------------------------------------------------------------------------------------------------------------------------------------------------------------------------------------------|
| <p>Medical Conditions:</p> <input type="checkbox"/> HTN <input type="checkbox"/> Dyslipidemia <input type="checkbox"/> CHF <input type="checkbox"/> Asthma <input type="checkbox"/> COPD <input type="checkbox"/> GERD <input type="checkbox"/> DVT <input type="checkbox"/> Arthritis<br><input type="checkbox"/> Seizure <input type="checkbox"/> CKD <input type="checkbox"/> Depression <input type="checkbox"/> Constipation <input type="checkbox"/> Insomnia <input type="checkbox"/> Parkinson <input type="checkbox"/> Alzheimer<br><input type="checkbox"/> Cancer <input type="checkbox"/> DM <input type="checkbox"/> History of bleeding <input type="checkbox"/> Other _____<br><input type="checkbox"/> Age > 65 years<br><input type="checkbox"/> history of gastrointestinal bleeding<br><input type="checkbox"/> history of stroke, and at least one of the following variables: myocardial infarction, hematocrit < 30%, creatinine > 1.5 mg/dL, and diabetes.<br><input type="checkbox"/> prior bleeding | <input type="checkbox"/> anemia<br><input type="checkbox"/> genetic factors (CYP2C9 polymorphism)<br><input type="checkbox"/> an excessive risk of falls<br><input type="checkbox"/> Recent surgery on critical organ (brain; eye)<br><input type="checkbox"/> Thrombocytopenia (e.g. chemotherapy) | <input type="checkbox"/> HAS-BLED $\geq$ 3<br><input type="checkbox"/> $\geq$ 65 years<br><input type="checkbox"/> $\geq$ 75 years<br><input type="checkbox"/> $\geq$ 80 years<br><input type="checkbox"/> Weight < 60 (Kg)<br><input type="checkbox"/> reduced platelet count or function<br><input type="checkbox"/> hypertension (uncontrolled) |
|------------------------------------------------------------------------------------------------------------------------------------------------------------------------------------------------------------------------------------------------------------------------------------------------------------------------------------------------------------------------------------------------------------------------------------------------------------------------------------------------------------------------------------------------------------------------------------------------------------------------------------------------------------------------------------------------------------------------------------------------------------------------------------------------------------------------------------------------------------------------------------------------------------------------------------------------------------------------------------------------------------------------------|-----------------------------------------------------------------------------------------------------------------------------------------------------------------------------------------------------------------------------------------------------------------------------------------------------|----------------------------------------------------------------------------------------------------------------------------------------------------------------------------------------------------------------------------------------------------------------------------------------------------------------------------------------------------|



|                                                                                                                                                                                                                                                                                                                                                                                                                                                                                                                                                                                                                                                                                                                                                                                                                                                                                                                                                                                                                                                                                                                                                                                                                                                                                                                                                                  |                                                                                                                                                                                                                                                                                                                                                                                                                                                                                                                                                                                                                                                                                                                                                                                                                                                                                                                                                                                                                                                                                                                                                                                                                                                                                              |                                                                                                                                                                                                                                                                                                                                                                                                                                                          |
|------------------------------------------------------------------------------------------------------------------------------------------------------------------------------------------------------------------------------------------------------------------------------------------------------------------------------------------------------------------------------------------------------------------------------------------------------------------------------------------------------------------------------------------------------------------------------------------------------------------------------------------------------------------------------------------------------------------------------------------------------------------------------------------------------------------------------------------------------------------------------------------------------------------------------------------------------------------------------------------------------------------------------------------------------------------------------------------------------------------------------------------------------------------------------------------------------------------------------------------------------------------------------------------------------------------------------------------------------------------|----------------------------------------------------------------------------------------------------------------------------------------------------------------------------------------------------------------------------------------------------------------------------------------------------------------------------------------------------------------------------------------------------------------------------------------------------------------------------------------------------------------------------------------------------------------------------------------------------------------------------------------------------------------------------------------------------------------------------------------------------------------------------------------------------------------------------------------------------------------------------------------------------------------------------------------------------------------------------------------------------------------------------------------------------------------------------------------------------------------------------------------------------------------------------------------------------------------------------------------------------------------------------------------------|----------------------------------------------------------------------------------------------------------------------------------------------------------------------------------------------------------------------------------------------------------------------------------------------------------------------------------------------------------------------------------------------------------------------------------------------------------|
| <p>Age Related <input type="checkbox"/> NO <input type="checkbox"/> YES</p> <p>Cognitive <input type="checkbox"/> NO <input type="checkbox"/> YES</p> <p>Cultural <input type="checkbox"/> NO <input type="checkbox"/> YES</p> <p>Emotional <input type="checkbox"/> NO <input type="checkbox"/> YES</p> <p>Hearing <input type="checkbox"/> NO <input type="checkbox"/> YES</p> <p>Language <input type="checkbox"/> NO <input type="checkbox"/> YES</p> <p>Reading <input type="checkbox"/> NO <input type="checkbox"/> YES</p> <p>Religious <input type="checkbox"/> NO <input type="checkbox"/> YES</p> <p>Visual <input type="checkbox"/> NO <input type="checkbox"/> YES</p> <p>No Barrier <input type="checkbox"/> NO <input type="checkbox"/> YES</p>                                                                                                                                                                                                                                                                                                                                                                                                                                                                                                                                                                                                    | <p><b>How much time did the pharmacist allocate to counseling the patient?</b> _____</p>                                                                                                                                                                                                                                                                                                                                                                                                                                                                                                                                                                                                                                                                                                                                                                                                                                                                                                                                                                                                                                                                                                                                                                                                     | <p><input type="checkbox"/> NO <input type="checkbox"/> YES</p> <p>Appropriate and accurate prescriptions given to patient prior to discharge <input type="checkbox"/> NO <input type="checkbox"/> YES</p> <p>Inpatient dosing history, discharge instructions and discharge summary sent to receiving provider in time to allow for receiving provider to effectively care for the patient <input type="checkbox"/> NO <input type="checkbox"/> YES</p> |
| <p><b>PART IV: Discharge medications and concomitant medications on the discharge instructions sheet or the Unified Prescription:</b></p>                                                                                                                                                                                                                                                                                                                                                                                                                                                                                                                                                                                                                                                                                                                                                                                                                                                                                                                                                                                                                                                                                                                                                                                                                        |                                                                                                                                                                                                                                                                                                                                                                                                                                                                                                                                                                                                                                                                                                                                                                                                                                                                                                                                                                                                                                                                                                                                                                                                                                                                                              | <p><b><u>LIST THE DISCHARGE MEDICATIONS (Available from Medications on discharge instructions sheet or the Unified Drug Prescription:</u></b></p>                                                                                                                                                                                                                                                                                                        |
| <p><b>Medications possibly affecting Anticoagulant dose:</b></p> <p><input type="checkbox"/> Concomitant use of P-gp inhibitor</p> <p><input type="checkbox"/> Strong CYP3A4 inhibitor</p> <p><input type="checkbox"/> Verapamil containing medicines</p> <p><input type="checkbox"/> Diltiazem</p> <p><input type="checkbox"/> Quinidine</p> <p><input type="checkbox"/> Amiodarone</p> <p><input type="checkbox"/> Dronedarone</p> <p><input type="checkbox"/> Clarithromycin</p> <p><input type="checkbox"/> Erythromycin</p> <p><input type="checkbox"/> Carbamazepine</p> <p><input type="checkbox"/> Phenobarbital</p> <p><input type="checkbox"/> Phenytoin</p> <p><input type="checkbox"/> St John's wort</p> <p><input type="checkbox"/> HIV protease inhibitors (e.g. ritonavir)</p> <p><input type="checkbox"/> Rifampicin</p> <p><input type="checkbox"/> Cyclosporin</p> <p><input type="checkbox"/> Tacrolimus</p> <p><input type="checkbox"/> Itraconazole</p> <p><input type="checkbox"/> Ketoconazole</p> <p><input type="checkbox"/> Posaconazole</p> <p><input type="checkbox"/> Voriconazole</p> <p><input type="checkbox"/> Fluconazole</p> <p><input type="checkbox"/> Naproxen</p> <p><b>Antiplatelet use on discharge</b></p> <p><input type="checkbox"/> NO <input type="checkbox"/> YES</p> <p><b>Specify antiplatelet therapy</b></p> | <p><b><u>Medications possibly interacting with Vitamin K antagonist</u></b></p> <p><input type="checkbox"/> Ciprofloxacin</p> <p><input type="checkbox"/> Amiodarone</p> <p><input type="checkbox"/> Phenylbutazone</p> <p><input type="checkbox"/> Alcohol (if concomitant liver disease)</p> <p><input type="checkbox"/> Cimetidine</p> <p><input type="checkbox"/> Boldo-fenugreek</p> <p><input type="checkbox"/> Anabolic steroids</p> <p><input type="checkbox"/> Cotrimoxazole</p> <p><input type="checkbox"/> Clofibrate</p> <p><input type="checkbox"/> Piroxicam</p> <p><input type="checkbox"/> Fish oil</p> <p><input type="checkbox"/> Quilnggao</p> <p><input type="checkbox"/> Zileuton</p> <p><input type="checkbox"/> Erythromycin</p> <p><input type="checkbox"/> Diltiazem</p> <p><input type="checkbox"/> Citalopram</p> <p><input type="checkbox"/> Mango</p> <p><input type="checkbox"/> Entacapone</p> <p><input type="checkbox"/> Omeprazole</p> <p><input type="checkbox"/> Fluconazole</p> <p><input type="checkbox"/> Fenofi brate</p> <p><input type="checkbox"/> Sertraline</p> <p><input type="checkbox"/> Isoniazid</p> <p><input type="checkbox"/> Propafenone</p> <p><input type="checkbox"/> Metronidazole</p> <p><input type="checkbox"/> Propranolol</p> | <p>1. _____</p> <p>2. _____</p> <p>3. _____</p> <p>4. _____</p> <p>5. _____</p> <p>6. _____</p> <p>7. _____</p> <p>8. _____</p> <p>9. _____</p> <p>10. _____</p> <p>11. _____</p> <p>12. _____</p> <p>13. _____</p> <p>14. _____</p>                                                                                                                                                                                                                     |
